# Supplementary material for: Registration of spatio-temporal point clouds of plants for phenotyping
Source: PubMed Central journal article supplement (PMC7906482; doi:10.1371/journal.pone.0247243), 2021-02-25

# Maize

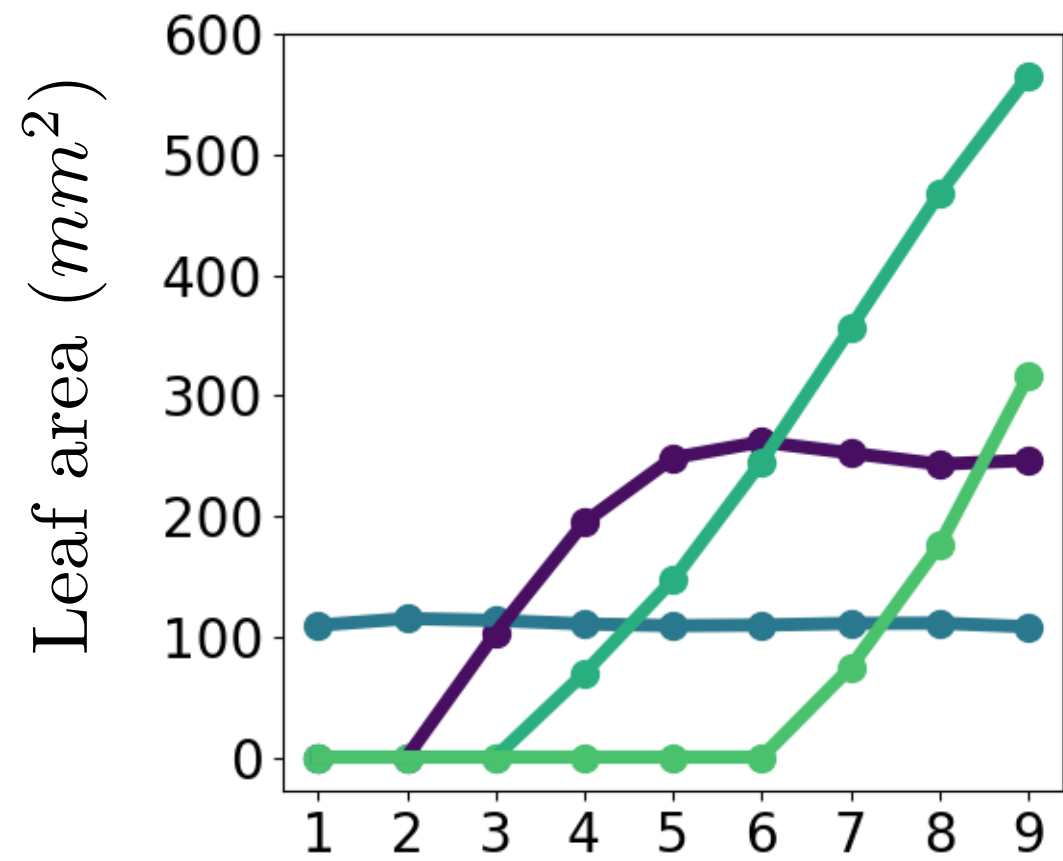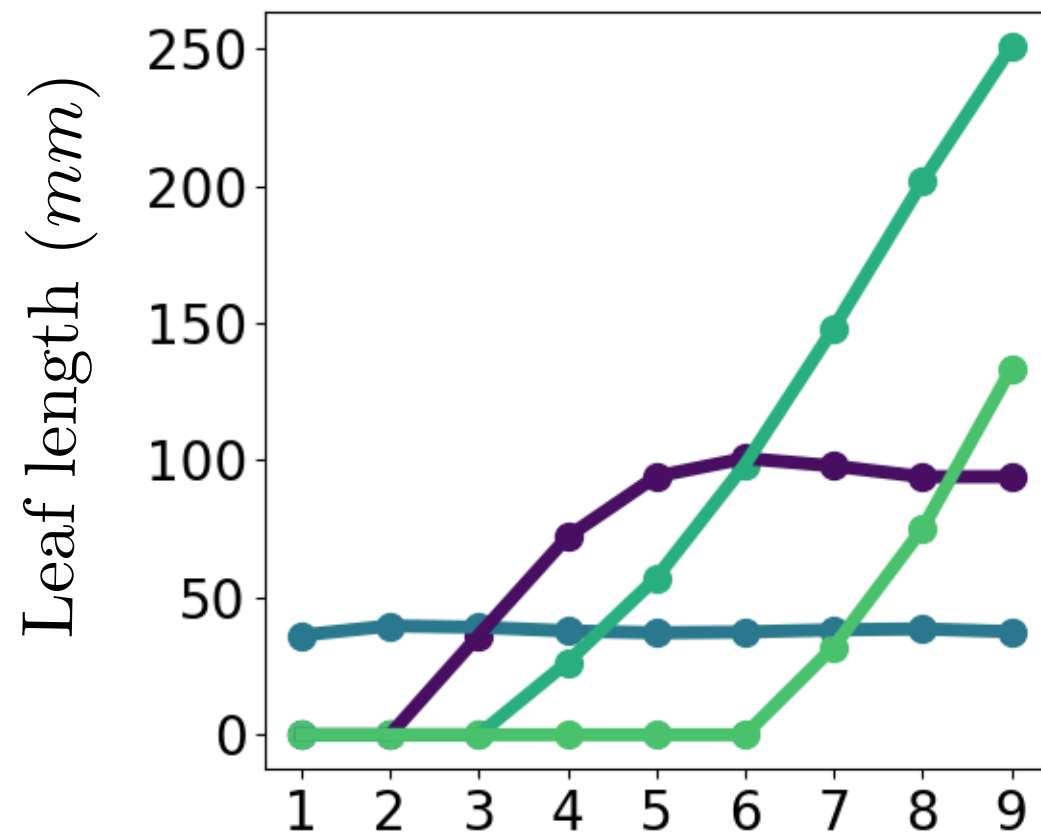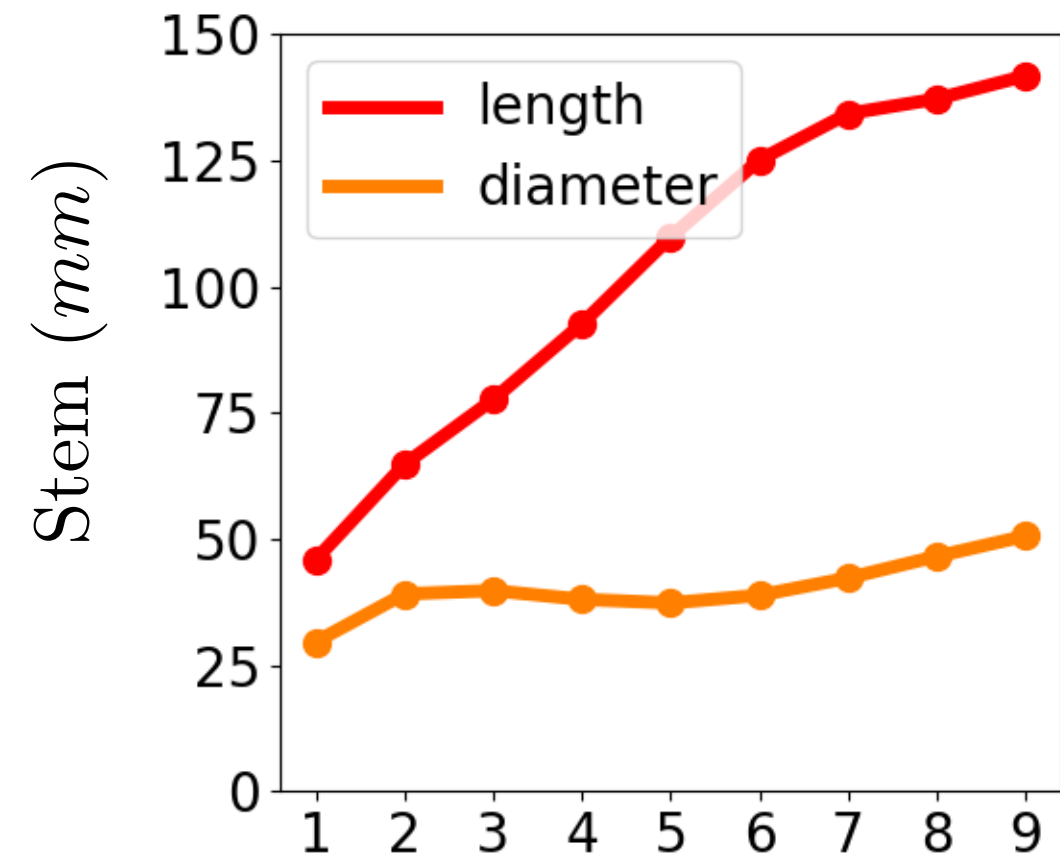

# Tomato

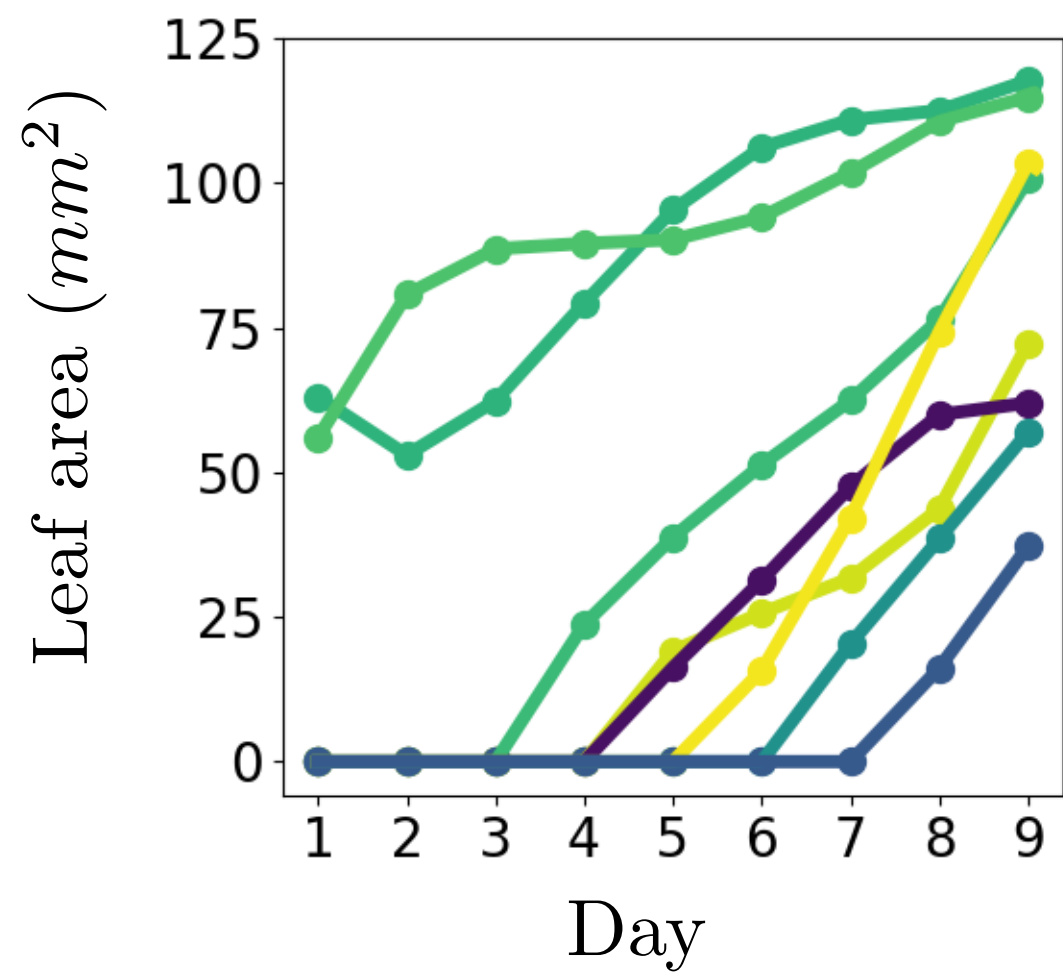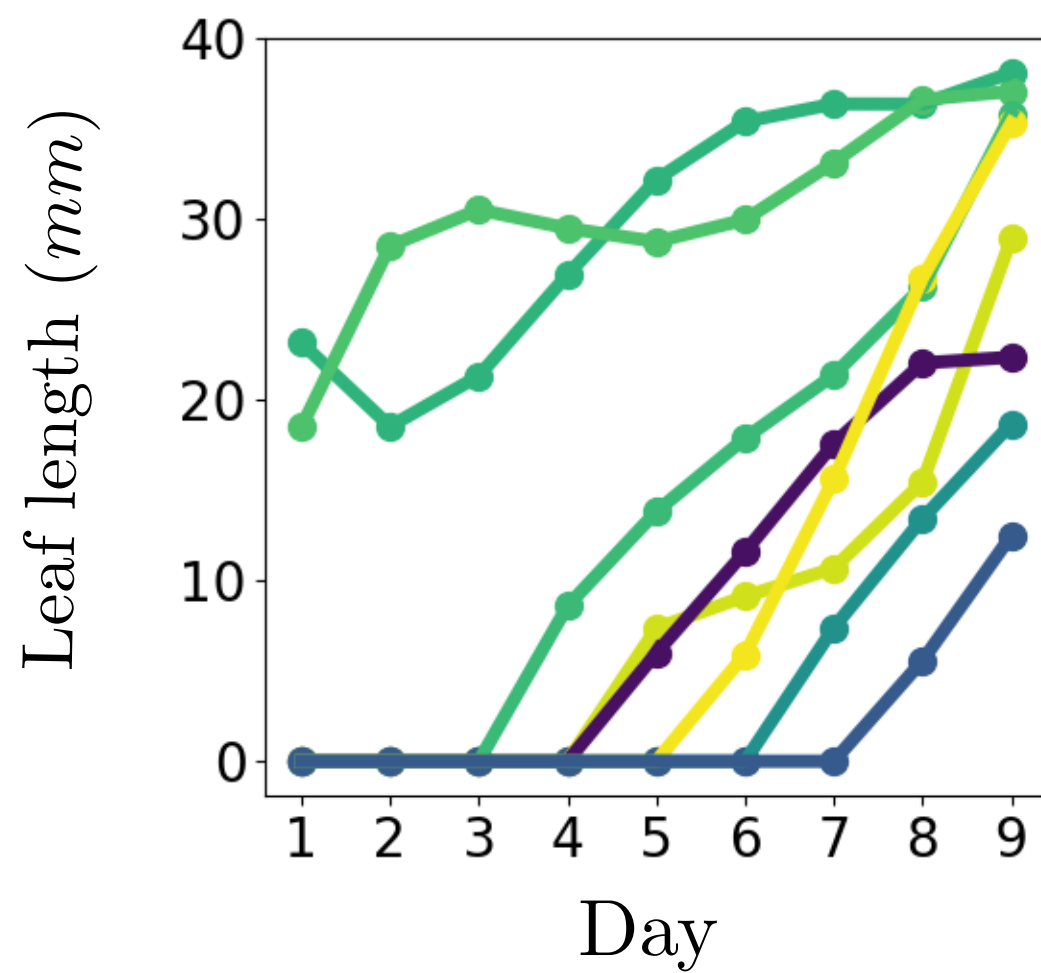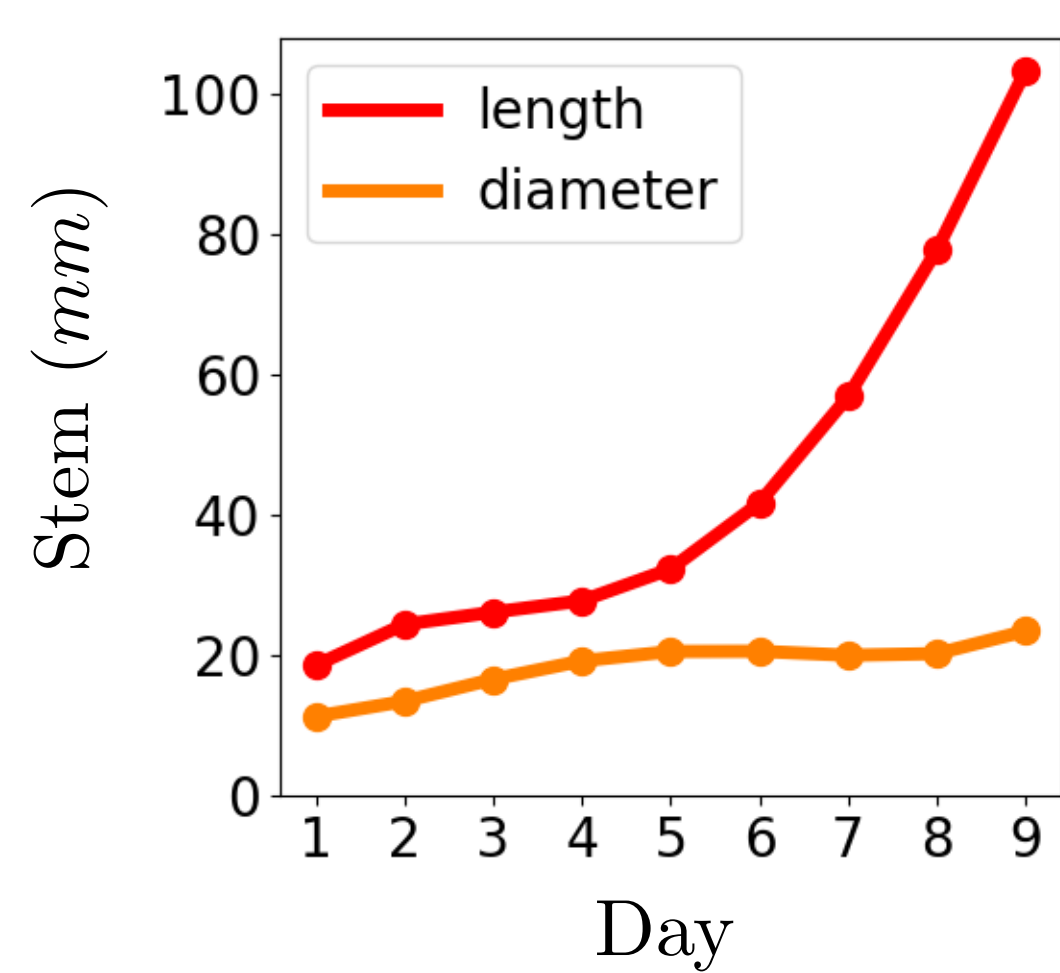

Supplement: pone.0247243.s002.pdf [file pone.0247243.s002.pdf]
