# Supplementary material for: Registration of spatio-temporal point clouds of plants for phenotyping
Source: PubMed Central journal article supplement (PMC7906482; doi:10.1371/journal.pone.0247243), 2021-02-25
Supplement: pone.0247243.s003.pdf [file pone.0247243.s003.pdf]

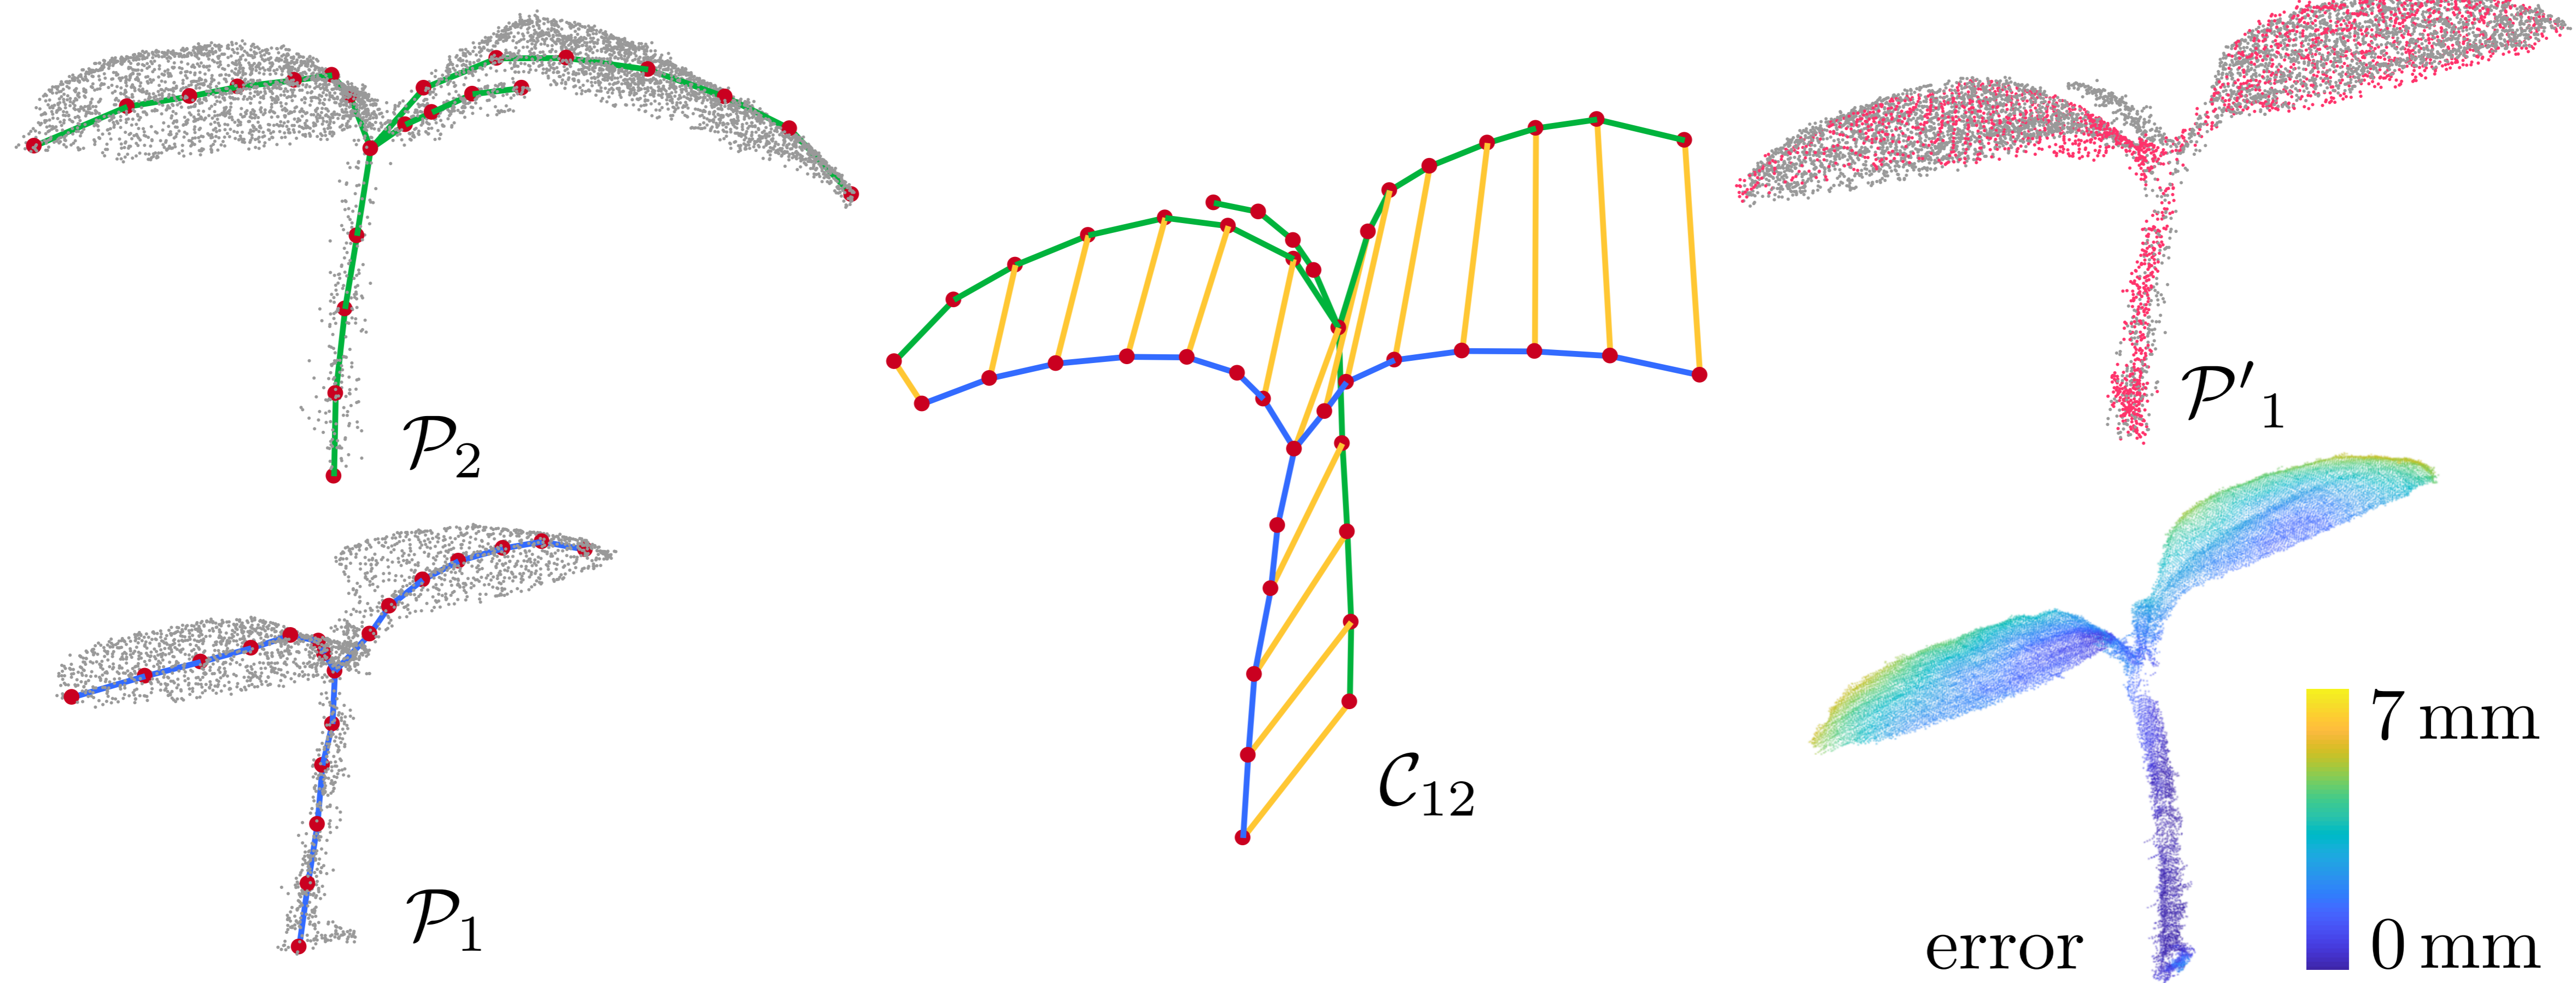

Day 1 vs. Day 2

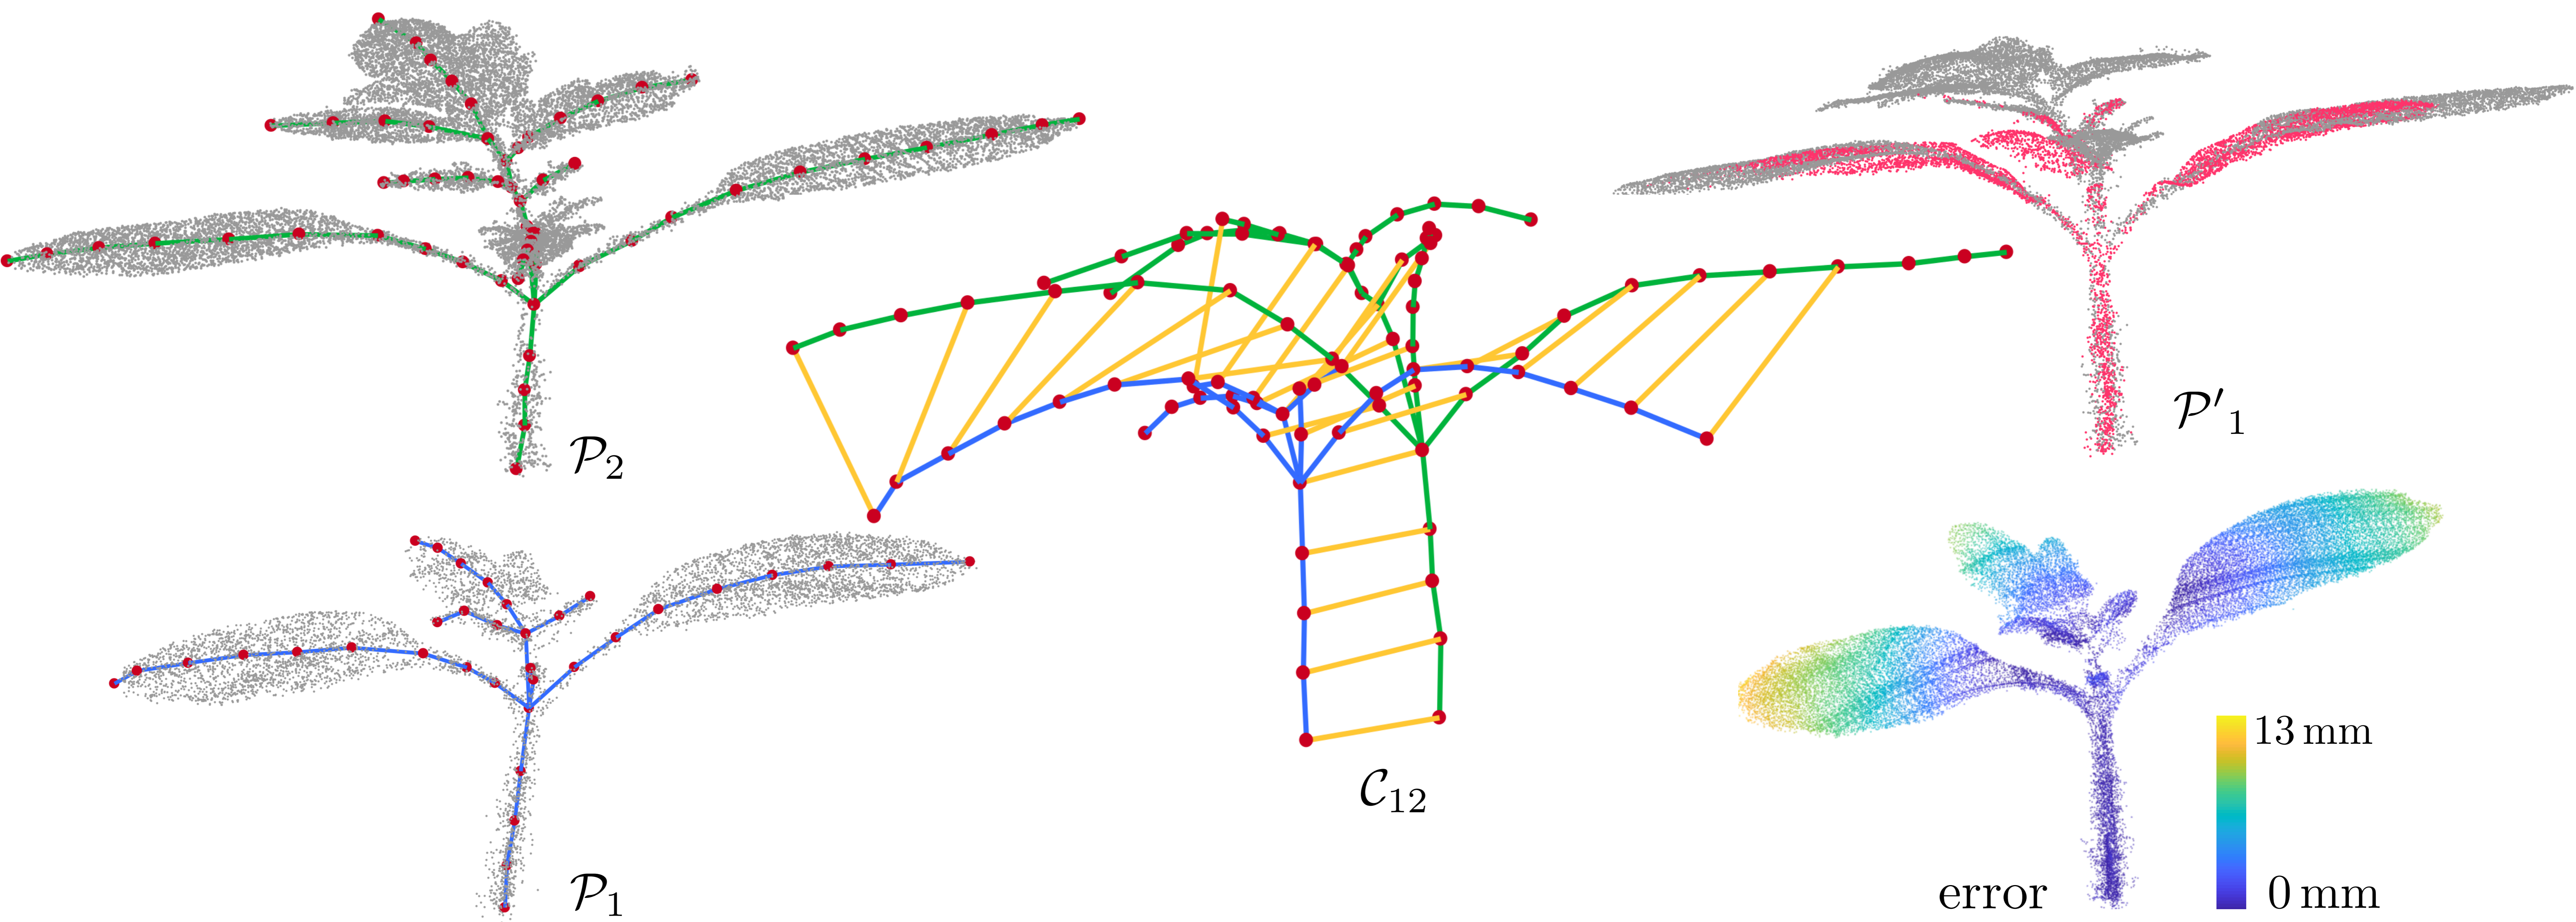

Day 6 vs. Day 10
